# Supplementary material for: “Do Your Homework as Your Heart Takes over When You Go Looking”: Factors Associated with Pre-Acquisition Information-Seeking among Prospective UK Dog Owners
Source: MDPI journal article supplement (doi:10.3390/ani13061015), 2023-03-10
Supplement: s1 [file s1]

# **Supplementary Materials**

Contents

A. "Choosing My Dog" survey questions relevant to pre-acquisition research..... 2

B. "Choosing My Dog" pre-arranged interview schedule ..... 7

C. "Choosing My Dog" *ad hoc* interview schedule..... 12

D. Participant recruitment ..... 14

E. Coding of survey free text responses..... 15

F. Participant demographics ..... 16

G. Dog demographics..... 18

H. Factors that influence whether people undertake research prior to acquiring a dog ..... 19



#### A. "Choosing My Dog" survey questions relevant to pre-acquisition research

N.B. Here, questions are grouped by topic and are not necessarily in the order they appeared to survey participants. Not all participants were asked every question: responses to previous questions was used to drive logical progression through aspects of the survey, i.e. those participants who did not own a dog were not asked questions about their dog. An asterisk (\*) denotes mandatory questions (i.e. participants were required to give a response before they could progress to the next part of the survey). Responses next to white circles (o) denote where only one answer could be selected. Multiple responses could be selected where they are next to a white square (□). Question text enclosed in square brackets ([]) denotes where an automated, individual question would be included, based on a respondents' previous response to a question (typically, their dog's name).

##### **Current and future dog ownership status** (ALL respondents)

| <b>Question</b>                                                    | <b>Response options</b>                                                                                                                                                                                                                                                                                                                                                                                           |
|--------------------------------------------------------------------|-------------------------------------------------------------------------------------------------------------------------------------------------------------------------------------------------------------------------------------------------------------------------------------------------------------------------------------------------------------------------------------------------------------------|
| Do you currently own a dog? *                                      | <ul style="list-style-type: none"><li>o Yes: I currently own at least one dog</li><li>o No: I don't own any dogs at the moment</li></ul>                                                                                                                                                                                                                                                                          |
| Are you seriously considering buying or adopting a new dog soon? * | <ul style="list-style-type: none"><li>o Yes: I'm actively looking for a new dog at the moment</li><li>o Yes: I am seriously considering getting a new dog in the next six months but I'm not actively looking at the moment</li><li>o Yes: I am seriously considering getting a new dog but this probably won't be in the next six months</li><li>o No: I'm not currently considering getting a new dog</li></ul> |

##### **Dog demographic variables** (CURRENT dog owners)

| <b>Question</b>                                                         | <b>Response options</b>                                                                                                                                                                                                  |
|-------------------------------------------------------------------------|--------------------------------------------------------------------------------------------------------------------------------------------------------------------------------------------------------------------------|
| Which of these best describes [your dog]? *                             | <ul style="list-style-type: none"><li>o Specific breed (e.g. Labrador Retriever, Whippet)</li><li>o Mix of two specific breeds (e.g. Labradoodle, Pug x Beagle)</li><li>o Mix of unspecified breeds or unknown</li></ul> |
| What breed is [your dog]? *                                             | <ul style="list-style-type: none"><li>o [List of common breeds]</li><li>o Breed not listed (please specify) [Free text]</li></ul>                                                                                        |
| What mix of two specific breeds is [your dog]? *                        | <ul style="list-style-type: none"><li>o [List of common mixes]</li><li>o Mix of breeds not listed (please specify) [Free text]</li></ul>                                                                                 |
| Is [your dog] a particular 'type' (e.g. Collie type, Labrador cross)? * | <ul style="list-style-type: none"><li>o [List of common mixed breed types]</li><li>o Type not listed (please specify) [Free text]</li></ul>                                                                              |
| Did you breed [dog's name] yourself? *                                  | <ul style="list-style-type: none"><li>o Yes<sup>1</sup></li><li>o No</li></ul>                                                                                                                                           |

---

<sup>1</sup> Those who bred their dog were not included in analyses related to this study.



When did you get  
[dog's name]? \*

- Month [Select a number]
- Year [Select a number]

Where did you get  
[dog's name] from? \*

- A dog breeder (e.g. someone who owns a female dog who has a litter)<sup>2</sup>
- Charity/rehoming centre in the UK which rehomes UK dogs only
- Charity/rehoming centre in the UK which rehomes dogs from overseas
- Charity/rehoming centre based overseas
- Friends or family who bred my dog themselves
- Friends or family who did not breed my dog themselves
- Pet shop
- Private/third party seller (e.g. someone selling a puppy or adult dog that they did not breed)
- Someone who was giving a dog away for free
- Other (please specify) [Free text]

***Previous dog ownership experience*** (CURRENT dog owners)

**Question**

Is this the first time  
you've lived with a  
dog?\*

**Response options**

- Yes: this is the first time I've lived with a dog
- No: I've previously lived with a dog/dogs as an adult
- No: I've previously lived with a dog/dogs as a child
- No: I've previously lived with a dog/dogs as an adult and as a child

Is this the first time  
you've lived with this  
breed or type of dog?\*

- Yes: this is the first time I've lived with this breed or type of dog
- No: I've previously lived with this breed or type of dog as an adult
- No: I've previously lived with this breed or type of dog as a child
- No: I've previously lived with this breed or type of dog as an adult and as a child

***Pre-acquisition research*** (CURRENT dog owners)

**Question**

Did you look for any  
information or ask  
anyone for advice  
before getting a dog?\*

**Response options**

- Yes
- No

What information or  
advice did you look for  
before getting your  
dog? \*

[Free text]

□

---

<sup>2</sup>For analyses, responses (including free text ones) were grouped into 4 categories: breeder; charity or rehoming centre; family, friends, or community; and private or third party seller.



**Post-acquisition reflections** (CURRENT dog owners)

| Question                                                                           | Response options |
|------------------------------------------------------------------------------------|------------------|
| What advice would you give to potential dog owners about buying or rehoming a dog? | [Free text]      |

**Previous dog ownership experience** (POTENTIAL dog owners)

| Question                           | Response options                                                                                                                                                                                                                                                                                                                                                                          |
|------------------------------------|-------------------------------------------------------------------------------------------------------------------------------------------------------------------------------------------------------------------------------------------------------------------------------------------------------------------------------------------------------------------------------------------|
| Have you lived with a dog before?* | <ul style="list-style-type: none"><li><input type="radio"/> No: I've never lived with a dog before</li><li><input type="radio"/> Yes: I've previously lived with a dog/dogs as an adult</li><li><input type="radio"/> Yes: I've previously lived with a dog/dogs as a child</li><li><input type="radio"/> Yes: I've previously lived with a dog/dogs as an adult and as a child</li></ul> |

**Pre-acquisition research** (POTENTIAL dog owners)

| Question                                                                             | Response options                                                                                                                                                                                                                         |
|--------------------------------------------------------------------------------------|------------------------------------------------------------------------------------------------------------------------------------------------------------------------------------------------------------------------------------------|
| Have you looked for any information or asked anyone for advice about getting a dog?* | <ul style="list-style-type: none"><li><input type="radio"/> Yes</li><li><input type="radio"/> No but I plan to</li><li><input type="radio"/> No and I don't plan to</li><li><input type="radio"/> I haven't thought about this</li></ul> |

**Pre-acquisition research** (POTENTIAL dog owners who had already undertaken research)

| Question                                                       | Response options |
|----------------------------------------------------------------|------------------|
| What information or advice did you want about getting a dog? * | [Free text]      |

**Pre-acquisition research** (POTENTIAL dog owners who plan to do some research)

| Question                                                      | Response options |
|---------------------------------------------------------------|------------------|
| What information or advice do you want about getting a dog? * | [Free text]      |

**Participant demographic variables** (ALL respondents)

| Question              | Response options                                                                                                                                                                                                                                   |
|-----------------------|----------------------------------------------------------------------------------------------------------------------------------------------------------------------------------------------------------------------------------------------------|
| What is your gender?* | <ul style="list-style-type: none"><li><input type="radio"/> Female</li><li><input type="radio"/> Male</li><li><input type="radio"/> Prefer not to say</li><li><input type="radio"/> Prefer to self-identify (please specify) [Free text]</li></ul> |



What age group do you fit into?\*

- ☐ 18 - 24 years
- ☐ 25 - 34 years
- ☐ 35 - 44 years
- ☐ 45 - 54 years
- ☐ 55 - 64 years
- ☐ 65 - 74 years
- ☐ 75 - 84 years
- ☐ 85 years or older
- ☐ Prefer not to say

What is the first part of your postcode?  
Please leave blank if you would prefer not to say.

[Free text]<sup>3</sup>

What is your highest level of qualification/education?\*

- ☐ No formal qualifications
- ☐ GCSE/National 5 or equivalent
- ☐ A level/Scottish Higher or equivalent
- ☐ Foundation degree/Higher National Diploma (HND) or equivalent
- ☐ University degree (e.g. BA, BSc) or equivalent
- ☐ Post graduate degree (e.g. MA, MBA, MSc, PhD) or equivalent
- ☐ Prefer not to say

Have you ever worked with dogs?\*

- ☐ Yes: I currently work with dogs
- ☐ Yes: I've previously worked with dogs but I don't at the moment
- ☐ No: I've never worked with dogs
- ☐ N/A: I've never worked
- ☐ Prefer not to say
- ☐ Please give more details if you would like to [Free text]

How did you find out about this survey?

- ☐ Colleague
- ☐ Dogs Trust charity shop
- ☐ Dogs Trust Contact Centre (phone/email)
- ☐ Dogs Trust Dog School
- ☐ Dogs Trust e-newsletter
- ☐ Dogs Trust event
- ☐ Dogs Trust rehoming centre
- ☐ Dogs Trust WAG magazine
- ☐ Friend or family
- ☐ Local press
- ☐ Search engine
- ☐ Social media (e.g. Facebook, Twitter)
- ☐ Prefer to self-identify (please specify) [Free text]

---

<sup>3</sup> Used to group by nation.



Do you have children under 18 living at home with you, or who you have regular responsibility for?\*

- ☐ Yes
- ☐ No
- ☐ Prefer not to say

What is your employment status?\*

- ☐ Employed full time (35 hours or more per week)
- ☐ Employed part time (less than 35 hours per week)
- ☐ Self employed full time (35 hours or more per week)
- ☐ Self employed part time (less than 35 hours per week)
- ☐ Unemployed and currently looking for work
- ☐ Unemployed and not currently looking for work
- ☐ Student
- ☐ Retired
- ☐ Homemaker/housewife/househusband
- ☐ Unable to work
- ☐ Prefer not to say

What is your annual household income?\*

- ☐ Less than £15,000
- ☐ £15,000 to £24,999
- ☐ £25,000 to £34,999
- ☐ £35,000 to £44,999
- ☐ £45,000 to £54,999
- ☐ £55,000 to £64,999
- ☐ £65,000 to £74,999
- ☐ £75,000 to £84,999
- ☐ £85,000 to £94,999
- ☐ £95,000 to £104,999
- ☐ £105,000 or more
- ☐ N/A: no one in my household works
- ☐ Prefer not to say



## B. “Choosing My Dog” pre-arranged interview schedule

N.B. These are the complete set of questions for *current* and *potential* dog owners (i.e. those who already owned a dog and were thinking about getting another dog). Interviews were semi-structured so not all owners were asked all questions. For interviews with *current* (not *potential*) owners, most later questions were omitted or amended whether appropriate. For interviews with *potential* (not *current*) owners, most earlier questions were omitted or amended where appropriate. Questions next to white circles (○) were prompt questions hence not all these questions were asked to every participant. Text enclosed in square brackets ([ ]) refers to guidance and notes for the interviewer.

### Opening (introductions)

[Thank participants, provide a brief overview of how the interview will run. Explanation of why we will be recording the interview and confirmation of consent. Check whether there are any questions then start recording.]

### Section A – About your dog

- Can you tell me about your dog?
  - What is their name?
  - How old are they?
  - What breed or type of dog are they?
- How long have you had your dog?
  - How old were they when you got them?
- What is your dog’s daily routine?
  - Who in your household looks after your dog?

### Section B – Deciding to get a dog

- Is this the first time you’ve owned a dog?
  - [If multiple previous dogs it might be useful to make a brief timeline/note all dogs]
- Can you tell me about your previous experiences with dogs?
  - What breeds(s) or types?
  - Were these experiences when you were a child or an adult?
  - How did you get your previous dog(s)
- Who made the decision to get [this dog]?
- How long had you been thinking about getting a dog?
  - How long had you been thinking about getting [this dog]?
  - What prompted you to act when you did?
- Can you describe why you wanted to have a dog?
  - What were the important reasons behind you wanting to have a dog (in general)?
  - How did you imagine having a dog would affect your life (and that of your household)?
  - Did you have any concerns about getting a dog?



## Section C – Before finding your dog

- You'd decided you wanted a dog: what did you do next?
  - Did you already have a clear idea of what you wanted?
    - Did you know what breed or type of dog you'd like?
    - Did you consider a range of breeds?
    - What about age of dog?
    - Did you have any ideas about where you wanted to get your dog from?
- Did you look for any information or ask anyone for advice before getting your dog?
  - Who did you ask?
  - Where did you look?
  - What information did you want to find?
  - Were you able to find that information?
  - Was there any information you couldn't find but you would have liked?
  - Approximately how long did you spend looking for information?
    - Was it a long or short process?
- What were important factors when trying to narrow down which breed or type of dog you wanted [if not already covered]?
  - What attracted you to a particular breed or type?
    - Had you had any previous experiences with the breed/type?
    - E.g. family/friends owned this breed/type?
  - What do you like about this particular breed?
- Did you change your mind or have any second thoughts during this process?
  - Was it an easy decision or did you rethink anything?
  - What did you do as a result of any concerns?

## Section D – Finding your dog

- Where did you get [your dog] from?
  - Was it a breeder/rehoming centre, etc.
    - Did this matter to you at the time?
      - Why/why not?
  - Why did you choose this source?
  - How did you find this source?
  - Was this the only place you looked?
  - [If no, probe more about other dogs they may have enquired about, e.g.]
    - Did you see any other dogs you liked?
    - Did you speak to the seller/rescue?
    - What happened?
    - Why did you decide against that dog?
  - What other sources did you consider?
    - What process did you go through to look for possible sources?
    - How did you know where to look?
- When was the first time you met [your dog]?



- What was the place like?
- What happened?
  - If [your dog] was a puppy, did you meet your dog's mother/siblings?
- What questions did you have (if any)?
- Were there any negatives about that experience?
  - Was there anything that made you have second thoughts or want to ask more questions?
- How did you feel?
- How did you decide on [your dog] [if not already covered]?
  - Did you already have a clear idea of what you wanted?
- How many times did you meet your dog before you took them home?
  - Over what period of time?
- What did your dog come home with?
  - Was there any after care offered?
  - E.g. Would any support be offered if there were any issues?
- Who was involved in the process?
  - E.g. household member/family?
    - [If not already know, ask about their previous experiences with dogs]
  - How were they involved in the process?
  - Was it a long or short process?
  - Was it easy or difficult?
  - How did you feel?
- Was it an easy decision or did you rethink anything?
  - Did you change your mind during this process?
  - What did you do as a result of any concerns
- How long overall do you think it took you to get [your dog]?

## **Section E – After acquiring your dog**

- How does [your dog] compare to the dog you thought you'd have, before you got them?
  - E.g. Is the breed or type of dog what you imagined yourself with?
- What did you imagine life with [your dog] would be like, before you got them?
  - Has it lived up to those expectations?
  - What changes has having a dog made to your life?
  - What have you most enjoyed?
  - Is there anything that's been different to what you expected?
- Would you recommend this breed or type of dog to potential owners?
  - Why/why not?
- Would you recommend the source you acquired your dog from to potential owners?
  - Why/why not?
- If you were looking for another dog, where would you look now?
- In hindsight, do you feel that you spent enough time making the decision to get a dog?
  - Did you have all the information you needed?
- What advice would you give to other potential dog owners?



## **Section F – Deciding to get a(nother) dog**

- You're planning to get a(nother) dog! Who made the decision to get a(nother) dog?
- How long have you been thinking about getting a(nother) dog?
  - What prompted you to act when you did?
- Can you describe why you want to have a(nother) dog?
  - How do you imagine having another dog will affect your life (and that of your household, including your current dogs)?
  - Do you have any concerns about getting a(nother) dog?

## **Section G – Before getting another dog**

- You decided that you want a(nother) dog: what did you do first?
  - Did you already have a clear idea of what you wanted?
    - Did you know what breed or type of dog you'd like?
    - Did you consider a range of breeds?
    - What about age of dog?
    - Did you have any ideas about where you want to get your dog from?
      - Why?
- What were important factors when trying to narrow down which breed or type of dog you wanted [if not already covered]?
  - What attracted you to a particular breed or type?
  - What do you like about this particular breed?
- Have you looked for any information or asked anyone for advice?
  - Who did you ask?
  - Where did you look?
  - What information did you want to find?
  - Were you able to find that information?
  - Was there any information you couldn't find but you would have liked?
  - Approximately how long did you spend looking for information?
    - Was it a long or short process?
- Have you changed your mind about what you initially wanted?
  - Why do think this is?
- Who else has been involved in this process?
  - E.g. household member/family?
  - Has it been easy or difficult?

## **Section H – Looking for a(nother) dog**

- What are you doing at the moment?
  - Are you actively looking for a(nother) dog?
  - What have you done in the last... day? / week?
  - What do you plan to do in the next week?
- Have you seen any dogs that you thought might be right for you?



- What did you like about them?
- Where did you see them? E.g. online?
- Were they from a breeder/rehoming centre, etc.
  - Did this matter to you at the time?
    - Why/why not?
- What did you do?
- What happened?
- What changed your mind? / Why didn't
- Have you met any dogs?
  - When was this?
  - What happened?
  - How did you find this source?
  - Was this the only place you looked?
- Have you considered any other sources?
  - What process did you go through to look for possible sources?
  - How did you know where to look?
  - What was your experience with (this sources/these sources) like?
- Have you changed your mind or had any second thoughts during this process?
  - Was it an easy decision or have you rethought anything?
  - What did you do as a result of any concerns?
- Given your experiences, what advice would you give to other potential dog owners?

**Ending** (brief summary of main points)

- Is there anything else we should have talked about but didn't – related to getting a dog?
- Have we missed anything that you think is important?
- Thank you so much for your time and sharing your experiences with us. This has been really interesting and is very important for our work. Thank you!



### C. “Choosing My Dog” *ad hoc* interview schedule

N.B. These are the questions for attendees at Responsible Dog Ownership events, hence it was assumed that participants would be *current* dog owners. On the rare occasion that participants were *potential* dog owners, questions were omitted or amended where appropriate. Interviews were semi-structured so not all owners were asked all questions. Depending on an owner’s time constraints, later questions may have been omitted. Questions next to white circles (o) were prompt questions hence not all these questions were asked to every participant. Text enclosed in square brackets ([ ]) refers to guidance and notes for the interviewer.

#### Opening

[Provide a brief overview of the study and ask if they have time to answer a few questions about their dog(s). Check any time constraints. Then explain how the interview will run. Explain why we would like to record the interview and ask for consent. Check whether there are any questions then start recording where possible/have permission.]

#### Section A – About your dog

- Name:
- Age:
- Sex [circle]: female male
- Any other current dogs:
- Previous dogs:
- Breed/type:
- How long had dog:
- Dog age when acquired:

#### Section B – Finding your dog

- Where did you get [your dog] from?
  - Why did you choose this source?
  - How did you find this source?
  - Did you look in any other places?
- How did you decide on your dog?
- When was the first time you met [your dog]?
- How many times did you meet your dog before you took them home?
  - Over what period of time?
- Who was involved in the process?

#### Section C – Deciding to get a dog

- Who made the decision to get [this dog]?
- How long ago?
- Why you wanted to have a dog?



#### **Section D – Before finding your dog**

- Did you have a clear idea of what you wanted? For example, did you know what breed or type of dog you'd like, what size, etc.?
  - Why was this?
- Did you look for any information or ask anyone for advice before getting your dog?
  - Who did you ask/where did you look?
  - Approximately how long did you spend looking for information (was it a long or short process)?
- Did you change your mind or have any second thoughts during this process?/Was it an easy decision or did you rethink anything?

#### **Section E – After acquiring your dog**

- What have you most enjoyed about owning [your dog]?
- Is there anything that's been different to what you expected?
- Would you recommend this breed or type of dog to potential owners?
  - Why/why not?
- Would you recommend the source you acquired your dog from to potential owners?
  - Why/why not?
- If you were looking for another dog, would you do anything differently?
  - Where would you look now?
- What advice would you give to family or friends who want to get a dog?



## D. Participant recruitment

**Supplementary Table S1.** Participant recruitment (current owners n=8,050, potential owners n=2,884).

| How participant found out about the survey | Current (n=8,050) |        | Potential (n=2,884) |        |
|--------------------------------------------|-------------------|--------|---------------------|--------|
|                                            | n                 | %      | n                   | %      |
| Social media                               | 4,643             | 57.68% | 1,175               | 40.74% |
| Dogs Trust e-newsletter                    | 1,082             | 13.44% | 146                 | 5.06%  |
| Dogs Trust Contact Centre                  | 719               | 8.93%  | 1,037               | 35.96% |
| Dogs Trust WAG magazine                    | 612               | 7.60%  | 121                 | 4.20%  |
| Dogs Trust rehoming centre                 | 115               | 1.43%  | 127                 | 4.40%  |
| Other                                      | 879               | 10.92% | 278                 | 9.64%  |



### E. Coding of survey free text responses

**Supplementary Table S2.** Coding of survey free text responses. Note “Number of responses” represents the number of respondents this question was shown to and does not necessarily mean that this number of respondents gave a valid response.

| Open-ended survey question                                                         | Ownership Status | Pre-acquisition research status | Number of respondents asked | Coding completed                                                                                                                                                                                                                                             |
|------------------------------------------------------------------------------------|------------------|---------------------------------|-----------------------------|--------------------------------------------------------------------------------------------------------------------------------------------------------------------------------------------------------------------------------------------------------------|
| What information or advice did you look for before getting your dog?               | Current          | Completed research              | 4381                        | <ul style="list-style-type: none"> <li>• Responses 1-1000: all coded (R.M.)</li> <li>• Responses 1001-2000: all coded (K.E.H.) plus every 25th response coded independent (R.M.)</li> <li>• Responses 2001-4381: every 25th response coded (R.M.)</li> </ul> |
| What advice would you give to potential dog owners about buying or rehoming a dog? | Current          | Completed research              | 8050                        | <ul style="list-style-type: none"> <li>• Coded as part of wider project: relevant responses compiled and re-coded (R.M. &amp; K.H.)</li> </ul>                                                                                                               |
| What information or advice did you look for before getting your dog?               | Potential        | Completed research              | 1955                        | <ul style="list-style-type: none"> <li>• Responses 1-1000: all coded (R.M.)</li> <li>• Responses 1001-1955: all coded (K.E.H.) plus every 25th response coded independently (R.M.)</li> </ul>                                                                |
| What information or advice do you want about getting a dog?                        | Potential        | Plan to undertake research      | 395                         | <ul style="list-style-type: none"> <li>• Responses 1-386: all coded (R.M.)</li> </ul>                                                                                                                                                                        |



## F. Participant demographics

**Supplementary Table S3.** Participant demographics (current owners n=8,050, potential owners n=2,884).

|                                                               | Current owners<br>(n=8,050) |        | Potential owners<br>(n=2,884) |        |
|---------------------------------------------------------------|-----------------------------|--------|-------------------------------|--------|
|                                                               | n                           | %      | n                             | %      |
| <b>Respondent gender</b>                                      |                             |        |                               |        |
| Female                                                        | 7,105                       | 88.26% | 2,304                         | 79.89% |
| Male                                                          | 865                         | 10.75% | 551                           | 19.11% |
| Non-binary                                                    | 8                           | 0.10%  | 1                             | 0.03%  |
| Prefer to self-identify                                       | 8                           | 0.10%  | 3                             | 0.10%  |
| Prefer not to say                                             | 64                          | 0.80%  | 25                            | 0.87%  |
| <b>Respondent age group</b>                                   |                             |        |                               |        |
| 18 - 24 years                                                 | 474                         | 5.89%  | 216                           | 7.49%  |
| 25 - 34 years                                                 | 1,248                       | 15.50% | 562                           | 19.49% |
| 35 - 44 years                                                 | 1,206                       | 14.98% | 453                           | 15.71% |
| 45 - 54 years                                                 | 1,916                       | 23.80% | 573                           | 19.87% |
| 55 - 64 years                                                 | 1,821                       | 22.62% | 599                           | 20.77% |
| 65 - 74 years                                                 | 1,126                       | 13.99% | 374                           | 12.97% |
| 75 - 84 years                                                 | 189                         | 2.35%  | 83                            | 2.88%  |
| 85 years or older                                             | 7                           | 0.09%  | 5                             | 0.17%  |
| Prefer not to say                                             | 63                          | 0.78%  | 19                            | 0.66%  |
| <b>Region (based on post code)</b>                            |                             |        |                               |        |
| England                                                       | 4,935                       | 61.30% | 1,764                         | 61.17% |
| East Midlands                                                 | 379                         | 4.71%  | 128                           | 4.44%  |
| East of England                                               | 647                         | 8.04%  | 201                           | 6.97%  |
| Greater London                                                | 375                         | 4.66%  | 177                           | 6.14%  |
| North East                                                    | 353                         | 4.39%  | 101                           | 3.50%  |
| North West                                                    | 808                         | 10.04% | 294                           | 10.19% |
| South East                                                    | 874                         | 10.86% | 376                           | 13.04% |
| South West                                                    | 833                         | 10.35% | 240                           | 8.32%  |
| West Midlands                                                 | 666                         | 8.27%  | 247                           | 8.56%  |
| Yorkshire and the Humber                                      | 605                         | 7.52%  | 224                           | 7.77%  |
| Northern Ireland                                              | 111                         | 1.38%  | 37                            | 1.28%  |
| Scotland                                                      | 601                         | 7.47%  | 265                           | 9.19%  |
| Wales                                                         | 327                         | 4.06%  | 124                           | 4.30%  |
| No response                                                   | 1,471                       | 18.27% | 470                           | 16.30% |
| <b>Highest level of qualification/education</b>               |                             |        |                               |        |
| No formal qualifications                                      | 321                         | 3.99%  | 128                           | 4.44%  |
| GCSE/National 5 or equivalent                                 | 1,384                       | 17.19% | 503                           | 17.44% |
| A level/Scottish Higher or equivalent                         | 965                         | 11.99% | 318                           | 11.03% |
| Foundation degree/Higher National Diploma (HND) or equivalent | 1,085                       | 13.48% | 370                           | 12.83% |
| University degree (e.g. BA, BSc) or equivalent                | 2,305                       | 28.63% | 791                           | 27.43% |
| Post graduate degree (e.g. MA, MBA, MSc, PhD) or equivalent   | 1,313                       | 16.31% | 471                           | 16.33% |
| Prefer not to say/no response                                 | 677                         | 8.41%  | 303                           | 10.51% |



|                                                             |       |        |       |        |
|-------------------------------------------------------------|-------|--------|-------|--------|
| <b>History with dogs</b>                                    |       |        |       |        |
| Previously lived with a dog/dogs as an adult and as a child | 3,546 | 44.05% | 1,403 | 48.65% |
| Previously lived with a dog/dogs as an adult                | 2,458 | 30.53% | 880   | 30.51% |
| Previously lived with a dog/dogs as a child                 | 1,188 | 14.76% | 303   | 10.51% |
| First time lived with a dog                                 | 858   | 10.66% | 275   | 9.54%  |
| Other                                                       | 0     | 0.00%  | 23    | 0.80%  |
| <b>Worked with dogs</b>                                     |       |        |       |        |
| Currently work with dogs                                    | 776   | 9.64%  | 155   | 5.37%  |
| Previously worked with dogs                                 | 786   | 9.76%  | 361   | 12.52% |
| Never worked with dogs                                      | 6,116 | 75.98% | 2,200 | 76.28% |
| N/A: never worked                                           | 172   | 2.14%  | 77    | 2.67%  |
| Prefer not to say/no response                               | 200   | 2.48%  | 91    | 3.16%  |
| <b>Children (&lt;18) living at home</b>                     |       |        |       |        |
| No                                                          | 6,519 | 80.98% | 2,287 | 79.30% |
| Yes                                                         | 1,456 | 18.09% | 578   | 20.04% |
| Prefer not to say                                           | 75    | 0.93%  | 19    | 0.66%  |
| <b>Employment status</b>                                    |       |        |       |        |
| Employed full time (35 hours or more per week)              | 2,957 | 36.73% | 1,089 | 37.76% |
| Employed part time (less than 35 hours per week)            | 1,386 | 17.22% | 506   | 17.55% |
| Self employed full time (35 hours or more per week)         | 362   | 4.50%  | 91    | 3.16%  |
| Self employed part time (less than 35 hours per week)       | 395   | 4.91%  | 123   | 4.26%  |
| Unemployed and currently looking for work                   | 55    | 0.68%  | 41    | 1.42%  |
| Unemployed and not currently looking for work               | 44    | 0.55%  | 32    | 1.11%  |
| Student                                                     | 174   | 2.16%  | 85    | 2.95%  |
| Retired                                                     | 1,878 | 23.33% | 614   | 21.29% |
| Homemaker/housewife/househusband                            | 307   | 3.81%  | 97    | 3.36%  |
| Unable to work                                              | 178   | 2.21%  | 77    | 2.67%  |
| Prefer not to say/no response                               | 314   | 3.90%  | 129   | 4.47%  |
| <b>Annual household income</b>                              |       |        |       |        |
| Less than £15,000                                           | 604   | 7.50%  | 205   | 7.11%  |
| £15,000 to £24,999                                          | 972   | 12.07% | 428   | 14.84% |
| £25,000 to £34,999                                          | 974   | 12.10% | 407   | 14.11% |
| £35,000 to £44,999                                          | 821   | 10.20% | 297   | 10.30% |
| £45,000 to £54,999                                          | 650   | 8.07%  | 233   | 8.08%  |
| £55,000 to £64,999                                          | 498   | 6.19%  | 161   | 5.58%  |
| £65,000 to £74,999                                          | 386   | 4.80%  | 132   | 4.58%  |
| £75,000 to £84,999                                          | 274   | 3.40%  | 93    | 3.22%  |
| £85,000 to £94,999                                          | 176   | 2.19%  | 50    | 1.73%  |
| £95,000 to £104,999                                         | 150   | 1.86%  | 38    | 1.32%  |
| £105,000 or more                                            | 314   | 3.90%  | 104   | 3.61%  |
| N/A: no one in my household works                           | 81    | 1.01%  | 30    | 1.04%  |
| Prefer not to say/no response                               | 2,150 | 26.71% | 706   | 24.48% |



## G. Dog demographics

**Supplementary Table S4.** Dog demographics (current owners, n=8,050).

|                                  | n     | %      |
|----------------------------------|-------|--------|
| <b>Source of dog</b>             |       |        |
| Charity/rehoming centre          | 3,427 | 42.57% |
| A dog breeder                    | 3,190 | 39.63% |
| Friends or family/community      | 979   | 12.16% |
| Private/third party seller       | 454   | 5.64%  |
| <b>Breed or type of dog</b>      |       |        |
| Specific breed                   | 4,420 | 54.91% |
| Mix of two specific breeds       | 1,788 | 22.21% |
| Mix of breeds or a type          | 1,842 | 22.88% |
| <b>Age of dog at acquisition</b> |       |        |
| Puppy (<=6 months)               | 4,381 | 54.42% |
| Juvenile (7-<12 months)          | 522   | 6.48%  |
| Young adult (1-<2 years)         | 899   | 11.17% |
| Mature adult (2-6 years)         | 1,718 | 21.34% |
| Senior adult (7-11 years)        | 465   | 5.78%  |
| Geriatric (>=12 years)           | 65    | 0.81%  |
| <b>Year of acquisition</b>       |       |        |
| 2000-2010                        | 1,150 | 14.29% |
| 2011                             | 346   | 4.30%  |
| 2012                             | 416   | 5.17%  |
| 2013                             | 515   | 6.40%  |
| 2014                             | 567   | 7.04%  |
| 2015                             | 659   | 8.19%  |
| 2016                             | 827   | 10.27% |
| 2017                             | 1,019 | 12.66% |
| 2018                             | 1,244 | 15.45% |
| 2019                             | 1,305 | 16.21% |
| No response                      | 2     | 0.02%  |



## H. Factors that influence whether people undertake research prior to acquiring a dog

**Supplementary Table S5.** Additional factors that may influence whether people undertake research prior to acquiring a dog: whether breed or type of dog was previously owned,  $X^2$  (1, N=8,050) = 394.45,  $p < .001^4$ .

| Previous ownership                                            | Undertook research |       |       |              |
|---------------------------------------------------------------|--------------------|-------|-------|--------------|
|                                                               | n                  | Total | %     | 95% CI       |
| First time lived with a breed/type                            | 3,180              | 5,054 | 62.9% | 61.6%, 64.2% |
| Previously lived with a breed/type as a child                 | 176                | 318   | 55.4% | 49.9%, 60.7% |
| Previously lived with a breed/type as an adult                | 823                | 2,107 | 39.1% | 37.0%, 41.2% |
| Previously lived with a breed/type as an adult and as a child | 202                | 571   | 35.4% | 31.5%, 39.4% |

**Supplementary Table S6.** Additional factors that may influence whether people undertake research prior to acquiring a dog: highest level of current education among potential owners,  $X^2$  (5, N=2,581) = 29.186,  $p < .001$ .

| Highest level of education                                    | Undertook research |       |        |                |
|---------------------------------------------------------------|--------------------|-------|--------|----------------|
|                                                               | n                  | Total | %      | 95% CI         |
| No formal qualifications                                      | 90                 | 128   | 70.31% | 61.88%, 77.56% |
| GCSE/National 5 or equivalent                                 | 390                | 503   | 77.53% | 73.68%, 80.97% |
| A level/Scottish Higher or equivalent                         | 271                | 318   | 85.22% | 80.88%, 88.72% |
| Foundation degree/Higher National Diploma (HND) or equivalent | 299                | 370   | 80.81% | 76.48%, 84.51% |
| University degree (e.g. BA, BSc) or equivalent                | 668                | 791   | 84.45% | 81.75%, 86.81% |
| Post graduate degree (e.g. MA, MBA, MSc, PhD) or equivalent   | 404                | 471   | 85.77% | 82.32%, 88.65% |

**Supplementary Table S7.** Additional factors that may influence whether people undertake research prior to acquiring a dog: children at home under 18, current owners:  $X^2$  (1, N=7,975) = 17.274,  $p < .001$ ; and potential owners<sup>5</sup>:  $X^2$  (1, N=2,865) = 5.8878,  $p < .01525$ .

| Children    | Undertook research       |       |       |              |                            |       |       |              |
|-------------|--------------------------|-------|-------|--------------|----------------------------|-------|-------|--------------|
|             | Current owners (n=7,975) |       |       |              | Potential owners (n=2,865) |       |       |              |
|             | n                        | Total | %     | 95% CI       | n                          | Total | %     | 95% CI       |
| Children    | 863                      | 1,456 | 59.3% | 56.7%, 61.8% | 492                        | 578   | 85.1% | 82.0%, 87.8% |
| No children | 3,470                    | 6,519 | 53.2% | 52.0%, 54.4% | 1,844                      | 2,287 | 80.6% | 79.0%, 82.2% |

**Supplementary Table S8.** Additional factors that may influence whether people undertake research prior to acquiring a dog: employment status among current owners :  $X^2$  (9, N=7,736) = 116.67,  $p < .001$ ; and potential owners<sup>6</sup>:  $X^2$  (9, N=2,755) = 47.867,  $p < .001$ .

| Employment status       | Undertook research       |       |       |              |                            |       |       |              |
|-------------------------|--------------------------|-------|-------|--------------|----------------------------|-------|-------|--------------|
|                         | Current owners (n=7,373) |       |       |              | Potential owners (n=2,865) |       |       |              |
|                         | n                        | Total | %     | 95% CI       | n                          | Total | %     | 95% CI       |
| Employed full time      | 1,760                    | 2,957 | 59.5% | 57.7%, 61.3% | 932                        | 1,089 | 85.6% | 83.4%, 87.6% |
| Employed part time      | 748                      | 1,386 | 54.0% | 51.3%, 56.6% | 417                        | 506   | 82.4% | 78.8%, 85.5% |
| Self-employed full time | 221                      | 362   | 61.1% | 55.9%, 65.9% | 73                         | 91    | 80.2% | 70.8%, 87.2% |
| Self-employed part time | 227                      | 395   | 57.5% | 52.5%, 62.2% | 106                        | 123   | 86.2% | 78.9%, 91.3% |

<sup>4</sup> Combines all those who had previously owned the breed or type.

<sup>5</sup> Potential owners who planned to undertake research are included within "potential owners" in Table S7.

<sup>6</sup> Potential owners who planned to undertake research are included within "potential owners" in Table S8.



|                                               |     |       |       |              |     |     |       |              |
|-----------------------------------------------|-----|-------|-------|--------------|-----|-----|-------|--------------|
| Homemaker/housewife/househusband              | 168 | 307   | 54.7% | 49.1%, 60.2% | 76  | 97  | 78.4% | 69.1%, 85.5% |
| Retired                                       | 840 | 1,878 | 44.7% | 42.5%, 47.0% | 454 | 614 | 73.9% | 70.3%, 77.3% |
| Unable to work                                | 89  | 178   | 50.0% | 42.7%, 57.3% | 65  | 77  | 84.4% | 74.6%, 91.0% |
| Unemployed and currently looking for work     | 25  | 55    | 45.5% | 33.0%, 58.5% | 33  | 41  | 80.5% | 65.7%, 90.0% |
| Unemployed and not currently looking for work | 26  | 44    | 59.1% | 44.4%, 72.3% | 21  | 32  | 65.6% | 48.2%, 79.7% |
| Student                                       | 106 | 174   | 60.9% | 53.5%, 67.9% | 76  | 85  | 89.4% | 80.9%, 94.5% |

**Supplementary Table S9.** Additional factors that may influence whether people undertake research prior to acquiring a dog: household income among current owners:  $\chi^2$  (11, N=5,900) = 118.64,  $p < .001$ ; and potential owners<sup>7</sup>:  $\chi^2$  (11, N=2,278) = 18.491,  $p = .071$  (NS).

| Annual household income        | Undertook research       |       |       |              |                            |       |       |              |
|--------------------------------|--------------------------|-------|-------|--------------|----------------------------|-------|-------|--------------|
|                                | Current owners (n=7,373) |       |       |              | Potential owners (n=2,865) |       |       |              |
|                                | n                        | Total | %     | 95% CI       | n                          | Total | %     | 95% CI       |
| N/A: no one in household works | 35                       | 81    | 43.2% | 33.0%, 54.1% | 22                         | 30    | 73.3% | 55.4%, 86.0% |
| Less than £15,000              | 257                      | 604   | 42.6% | 38.7%, 46.5% | 167                        | 205   | 81.5% | 75.6%, 86.2% |
| £15,000 to £24,999             | 493                      | 972   | 50.7% | 47.6%, 53.9% | 347                        | 428   | 81.1% | 77.1%, 84.2% |
| £25,000 to £34,999             | 500                      | 974   | 51.3% | 48.2%, 54.5% | 342                        | 407   | 84.0% | 80.1%, 87.3% |
| £35,000 to £44,999             | 471                      | 821   | 57.4% | 54.0%, 60.7% | 251                        | 297   | 84.5% | 79.9%, 88.2% |
| £45,000 to £54,999             | 381                      | 650   | 58.6% | 54.8%, 62.3% | 200                        | 233   | 85.8% | 80.7%, 89.8% |
| £55,000 to £64,999             | 304                      | 498   | 61.0% | 56.7%, 65.2% | 135                        | 161   | 83.9% | 77.3%, 88.8% |
| £65,000 to £74,999             | 245                      | 386   | 63.5% | 58.6%, 68.1% | 113                        | 132   | 85.6% | 78.5%, 90.7% |
| £75,000 to £84,999             | 188                      | 274   | 68.6% | 62.9%, 73.8% | 86                         | 93    | 92.5% | 85.0%, 96.6% |
| £85,000 to £94,999             | 109                      | 176   | 61.9% | 54.6%, 68.8% | 35                         | 50    | 70.0% | 56.2%, 81.0% |
| £95,000 to £104,999            | 100                      | 150   | 66.7% | 58.8%, 73.7% | 32                         | 38    | 84.2% | 69.2%, 92.9% |
| £105,000 or more               | 198                      | 314   | 63.1% | 57.6%, 68.2% | 88                         | 104   | 84.6% | 76.4%, 90.4% |

**Supplementary Table S10.** Additional factors that may influence whether people undertake research prior to acquiring a dog: gender among current owners:  $\chi^2$  (2, N=7,986) = 12.21,  $p = .039$ ; and potential owners<sup>8</sup>:  $\chi^2$  (2, N=2,858) = 0.82514,  $p = .662$  (NS).

| Gender                  | Undertook research       |       |       |              |                            |       |       |              |
|-------------------------|--------------------------|-------|-------|--------------|----------------------------|-------|-------|--------------|
|                         | Current owners (n=7,986) |       |       |              | Potential owners (n=2,858) |       |       |              |
|                         | n                        | Total | %     | 95% CI       | n                          | Total | %     | 95% CI       |
| Female                  | 3,895                    | 7,105 | 54.8% | 53.7%, 56.0% | 1,883                      | 2,304 | 81.7% | 80.1%, 83.3% |
| Male                    | 439                      | 865   | 50.8% | 47.4%, 54.1% | 444                        | 551   | 80.6% | 77.1%, 83.7% |
| Prefer to self-identify | 14                       | 16    | 87.5% | 62.7%, 97.8% | 2                          | 3     | 66.7% | 5.6%, 79.8%  |

<sup>7</sup> Potential owners who planned to undertake research are included within "potential owners" in Table S9.

<sup>8</sup> Potential owners who planned to undertake research are included within "potential owners" in Table S10.
